# Supplementary material for: Water quality assessment of a small peri-urban river using low and high frequency monitoring
Source: Royal Society of Chemistry journal article supplement (doi:10.1039/c5em00659g), 2016-01-01

## Water quality assessment of a small peri-urban river using low and high frequency monitoring

A. Ivanovsky<sup>(1)</sup>, J. Criquet<sup>(1)</sup>, D. Dumoulin<sup>(1)</sup>, C. Alary<sup>(2)</sup>, J. Prygiel<sup>(1,3)</sup>, L. Duponchel<sup>(1)</sup> and G. Billon<sup>(1)\*</sup>

<sup>1</sup> LASIR UMR CNRS 8516 – University Lille 1 Sciences and Technologies, 59655 Villeneuve d’Ascq, France

<sup>2</sup> Ecole des Mines de Douai, LGCgE, GCE, 59500 Douai, France

<sup>3</sup> Agence de l’Eau Artois-Picardie, 59500 Douai, France

### Supplementary data

**Table S1:** Dates of sampling (historical monitoring) with river flow and rainfall.

| Date            | River Flow<br>(m <sup>3</sup> s <sup>-1</sup> ) | Rainfall<br>(mm) |
|-----------------|-------------------------------------------------|------------------|
| <b>1/24/07</b>  | 0.82                                            | 0                |
| <b>2/22/07</b>  | 0.64                                            | 0.2              |
| <b>3/23/07</b>  | 1.12                                            | 0.4              |
| <b>4/25/07</b>  | 0.27                                            | 0                |
| <b>5/31/07</b>  | 0.84                                            | 2.2              |
| <b>6/29/07</b>  | 0.38                                            | 3.4              |
| <b>7/30/07</b>  | 0.51                                            | 0.2              |
| <b>8/29/07</b>  | 0.30                                            | 0                |
| <b>9/27/07</b>  | 0.29                                            | 0                |
| <b>10/16/07</b> | 0.22                                            | 0                |
| <b>11/9/07</b>  | 0.31                                            | 0                |
| <b>12/11/07</b> | 2.28                                            | 4.4              |
| <b>3/19/08</b>  | 1.05                                            | 2.2              |
| <b>4/17/08</b>  | 0.47                                            | 0                |
| <b>5/23/08</b>  | 0.37                                            | 0                |
| <b>6/18/08</b>  | 0.69                                            | 0                |
| <b>7/21/08</b>  | 0.20                                            | 0                |
| <b>8/21/08</b>  | 0.30                                            | 0.2              |
| <b>9/17/08</b>  | 0.33                                            | 0                |

|                 |      |     |
|-----------------|------|-----|
| <b>10/22/08</b> | 0.28 | 0   |
| <b>2/18/09</b>  | 1.05 | 0   |
| <b>4/20/09</b>  | 0.44 | 0   |
| <b>6/19/09</b>  | 0.51 | 0.2 |
| <b>8/20/09</b>  | 0.14 | 0   |
| <b>10/20/09</b> | 0.14 | 0   |
| <b>12/15/09</b> | 0.28 | 0   |
| <b>3/15/10</b>  | 0.37 | 0   |
| <b>4/13/10</b>  | 0.32 | 0   |
| <b>6/8/10</b>   | 0.52 | 6.5 |
| <b>6/23/10</b>  | 0.15 | 0   |
| <b>8/11/10</b>  | 0.17 | 3.8 |
| <b>10/8/10</b>  | 0.16 | 0.4 |
| <b>12/21/10</b> | 0.57 | 1.2 |
| <b>2/10/11</b>  | 0.36 | 2.6 |
| <b>4/20/11</b>  | 0.25 | 0   |
| <b>6/23/11</b>  | 0.15 | 0.4 |
| <b>8/22/11</b>  | 0.69 | 6.8 |
| <b>10/20/11</b> | 0.11 | 0   |
| <b>12/12/11</b> | 0.73 | 2   |
| <b>2/10/12</b>  | 0.27 | 0   |
| <b>4/12/12</b>  | 0.54 | 5.2 |
| <b>6/8/12</b>   | NA   | 0   |
| <b>8/23/12</b>  | 0.28 | 1.8 |
| <b>10/4/12</b>  | 0.35 | 19  |
| <b>12/11/12</b> | 0.91 | 0   |

**Figure S1:** PCA on the high frequency monitoring dataset with seasonal classes; a) dry days and b) rainstorms.

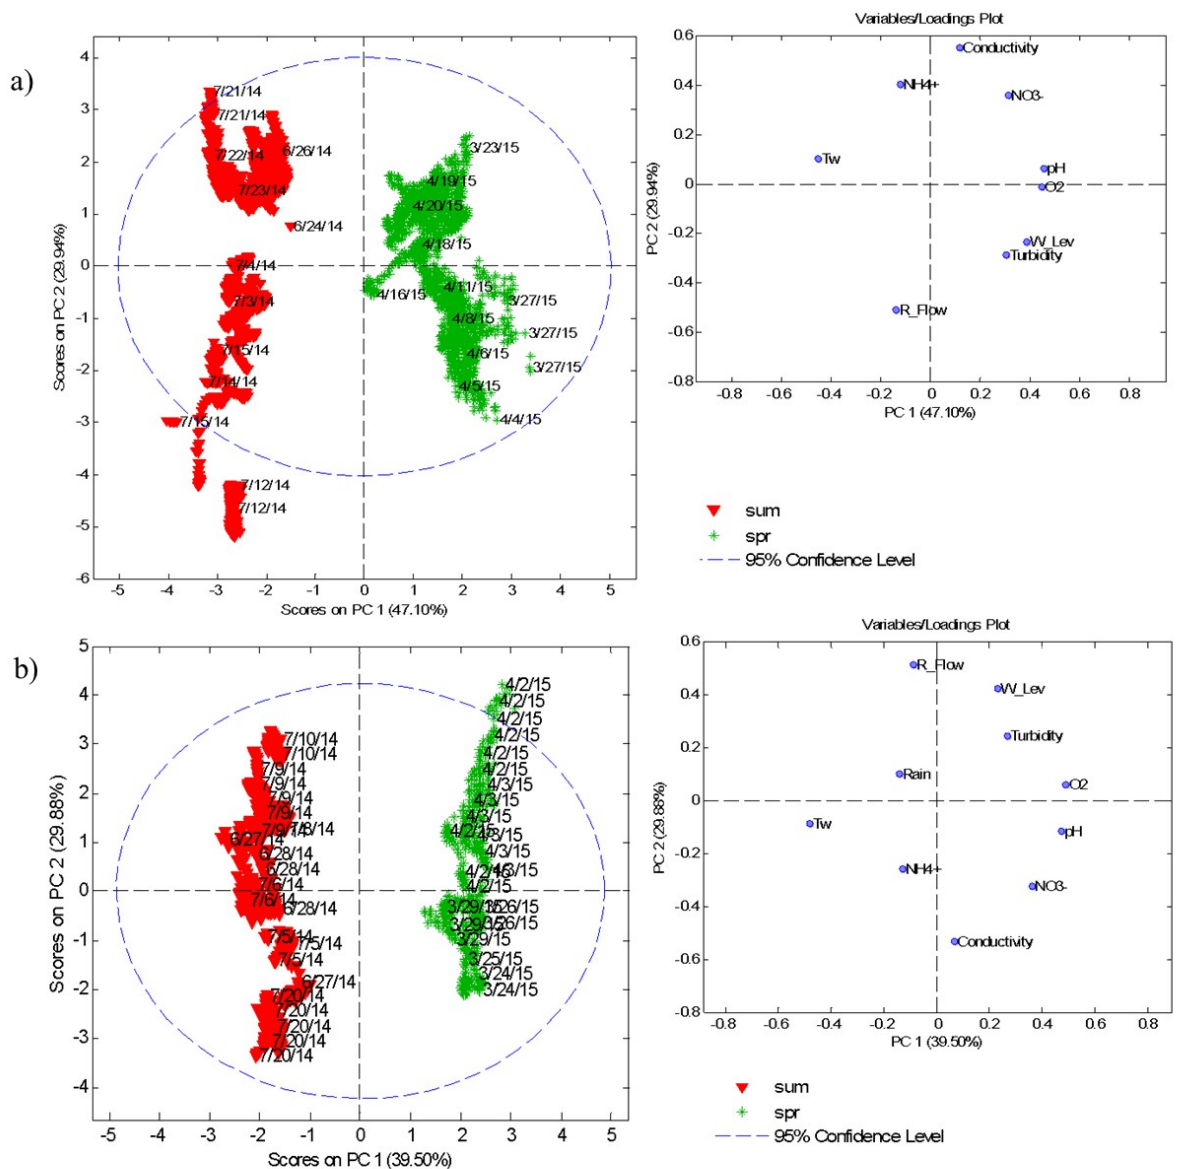

Supplement: c5em00659g1.pdf [file c5em00659g1.pdf]
